# Supplementary material
Source: Springer Nature journal article supplement (https://www.springermedizin.de/resource/supplementary/12871_2014_243_MOESM4_ESM.pdf/9429226)

# ETT

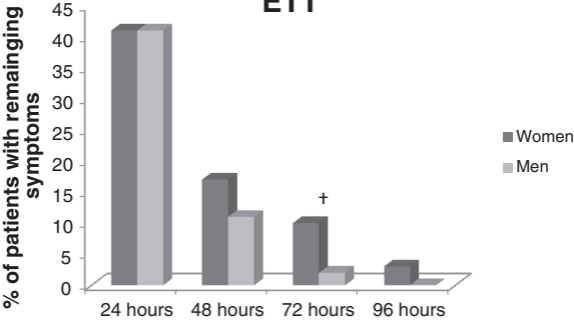

Supplement: MOESM4 [file 9429226]
